# Supplementary material for: Prioritisation of potential drug targets against Bartonella bacilliformis by an integrative in-silico approach
Source: PubMed Central journal article supplement (PMC7416641; doi:10.1590/0074-02760200184), 2020-08-10
Supplement: 1678-8060-mioc-115-e200184-s.pdf [file 1678-8060-mioc-115-e200184-s.pdf]

TABLE I

Proteins highly druggable (HD) with structures modeled from a template that was co-crystallised in the presence of an inhibitor or a drug-like compound (MD+)

| Locus tag     | Gene          | Gene product                                                                       | DS   |
|---------------|---------------|------------------------------------------------------------------------------------|------|
| AWH67_RS00420 | <i>thiE</i>   | thiamine phosphate synthase                                                        | 1    |
| AWH67_RS01825 | -----         | cytochrome c family protein                                                        | 1    |
| AWH67_RS04570 | -----         | acyl-CoA dehydrogenase                                                             | 1    |
| AWH67_RS01650 | <i>fabI</i>   | enoyl-[acyl-carrier-protein] reductase                                             | 0.99 |
| AWH67_RS01730 | <i>infB</i>   | translation initiation factor IF-2                                                 | 0.99 |
| AWH67_RS01235 | <i>prfC</i>   | peptide chain release factor 3                                                     | 0.99 |
| AWH67_RS04810 | <i>gcvP</i>   | glycine dehydrogenase (aminomethyl-transferring)                                   | 0.99 |
| AWH67_RS01195 | -----         | LPS export ABC transporter ATP-binding protein                                     | 0.98 |
| AWH67_RS04335 | <i>nuoM</i>   | NADH-quinone oxidoreductase subunit M                                              | 0.98 |
| AWH67_RS00525 | -----         | ABC transporter ATP-binding protein                                                | 0.98 |
| AWH67_RS02850 | <i>dxs</i>    | 1-deoxy-D-xylulose-5-phosphate synthase                                            | 0.98 |
| AWH67_RS05345 | -----         | DUF1009 domain-containing protein                                                  | 0.98 |
| AWH67_RS02660 | <i>thiE</i>   | thiamine phosphate synthase                                                        | 0.97 |
| AWH67_RS04105 | <i>folA</i>   | dihydrofolate reductase                                                            | 0.97 |
| AWH67_RS03780 | <i>lgt</i>    | prolipoprotein diacylglycerol transferase                                          | 0.97 |
| AWH67_RS01010 | <i>phaAB</i>  | monovalent cation/H <sup>+</sup> antiporter subunit A                              | 0.97 |
| AWH67_RS03605 | -----         | ABC transporter substrate-binding protein                                          | 0.97 |
| AWH67_RS01025 | <i>lpdA1</i>  | dihydrolipoyl dehydrogenase                                                        | 0.96 |
| AWH67_RS02300 | <i>serS</i>   | serine--tRNA ligase                                                                | 0.96 |
| AWH67_RS02640 | <i>thiC</i>   | phosphomethylpyrimidine synthase                                                   | 0.96 |
| AWH67_RS02270 | -----         | peptidylprolyl isomerase                                                           | 0.96 |
| AWH67_RS03970 | <i>murE</i>   | UDP-N-acetylmuramoyl-L-alanyl-D-glutamate--2, 6-diaminopimelate ligase             | 0.95 |
| AWH67_RS03610 | -----         | ABC transporter substrate-binding protein                                          | 0.95 |
| AWH67_RS02235 | <i>pdhA</i>   | pyruvate dehydrogenase (acetyl-transferring) E1 component subunit alpha            | 0.95 |
| AWH67_RS03355 | <i>pyrD</i>   | quinone-dependent dihydroorotate dehydrogenase                                     | 0.94 |
| AWH67_RS04295 | <i>nuoE</i>   | NADH-quinone oxidoreductase subunit                                                | 0.94 |
| AWH67_RS02305 | <i>rlmJ</i>   | 23S rRNA (adenine(2030)-N(6))-methyltransferase                                    | 0.94 |
| AWH67_RS05465 | -----         | NADPH:quinone oxidoreductase                                                       | 0.93 |
| AWH67_RS04150 | <i>cycA</i>   | D-serine/D-alanine/glycine transporter                                             | 0.93 |
| AWH67_RS03525 | <i>gidC</i>   | membrane protein insertase                                                         | 0.92 |
| AWH67_RS05265 | -----         | penicillin-binding protein                                                         | 0.92 |
| AWH67_RS02020 | <i>bioY</i>   | biotin transporter                                                                 | 0.91 |
| AWH67_RS02100 | <i>tuf</i>    | elongation factor Tu                                                               | 0.91 |
| AWH67_RS02505 | <i>panC</i>   | pantoate--beta-alanine ligase                                                      | 0.91 |
| AWH67_RS05820 | <i>glnA</i>   | type I glutamate--ammonia ligase                                                   | 0.91 |
| AWH67_RS02795 | -----         | HAD family phosphatase                                                             | 0.90 |
| AWH67_RS02025 | <i>pheP</i>   | amino acid permease                                                                | 0.90 |
| AWH67_RS02215 | <i>lipA</i>   | lipoyl synthase                                                                    | 0.88 |
| AWH67_RS02915 | <i>ispE</i>   | 4-(cytidine 5'-diphospho)-2-C-methyl-D-erythritol kinase                           | 0.88 |
| AWH67_RS02820 | <i>ispH</i>   | 4-hydroxy-3-methylbut-2-enyl diphosphate reductase                                 | 0.88 |
| AWH67_RS01255 | <i>tsaE</i>   | tRNA (adenosine(37)-N6)-threonylcarbamoyltransferase complex ATPase subunit type 1 | 0.88 |
| AWH67_RS01475 | <i>afeB</i>   | manganese transporter                                                              | 0.86 |
| AWH67_RS03135 | <i>usp</i>    | universal stress protein                                                           | 0.86 |
| AWH67_RS00295 | <i>dnaG</i>   | DNA primase                                                                        | 0.86 |
| AWH67_RS02890 | <i>purD</i>   | phosphoribosylamine--glycine ligase                                                | 0.86 |
| AWH67_RS05775 | -----         | MFS transporter                                                                    | 0.86 |
| AWH67_RS04220 | -----         | MFS transporter                                                                    | 0.86 |
| AWH67_RS00840 | -----         | DNA-binding protein                                                                | 0.85 |
| AWH67_RS01270 | <i>folC</i>   | bifunctional folylpolyglutamate synthase/dihydrofolate synthase                    | 0.85 |
| AWH67_RS02790 | <i>ccrMIM</i> | site-specific DNA-methyltransferase                                                | 0.85 |
| AWH67_RS03180 | <i>mgtE</i>   | magnesium transporter                                                              | 0.85 |
| AWH67_RS05670 | <i>purN</i>   | phosphoribosylglycinamide formyltransferase                                        | 0.85 |
| AWH67_RS03740 | <i>yhcF</i>   | redox-regulated ATPase                                                             | 0.84 |
| AWH67_RS01750 | <i>trmB</i>   | tRNA (guanosine(46)-N7)-methyltransferase                                          | 0.84 |
| AWH67_RS02770 | <i>ppdK</i>   | pyruvate, phosphate dikinase                                                       | 0.84 |
| AWH67_RS02665 | <i>thiD</i>   | hydroxymethylpyrimidine/phosphomethylpyrimidine kinase                             | 0.84 |
| AWH67_RS04635 | <i>cobT</i>   | nicotinate-nucleotide--dimethylbenzimidazole phosphoribosyltransferase             | 0.84 |

| Locus tag     | Gene         | Gene product                                                                                 | DS    |
|---------------|--------------|----------------------------------------------------------------------------------------------|-------|
| AWH67_RS02805 | -----        | PAS domain S-box protein                                                                     | 0.84  |
| AWH67_RS02395 | <i>acpP</i>  | acyl carrier protein                                                                         | 0.83  |
| AWH67_RS05400 | <i>gor</i>   | glutathione-disulfide reductase                                                              | 0.83  |
| AWH67_RS04580 | <i>pyrC</i>  | dihydroorotase                                                                               | 0.83  |
| AWH67_RS00580 | <i>ispG</i>  | 4-hydroxy-3-methylbut-2-en-1-yl diphosphate synthase (flavodoxin)                            | 0.83  |
| AWH67_RS00500 | <i>ikt</i>   | transketolase                                                                                | 0.82  |
| AWH67_RS03115 | <i>ugpC</i>  | sn-glycerol-3-phosphate import ATP-binding protein                                           | 0.82  |
| AWH67_RS01870 | <i>pstB</i>  | phosphate ABC transporter ATP-binding protein                                                | 0.82  |
| AWH67_RS00330 | <i>dut</i>   | dUTP diphosphatase                                                                           | 0.81  |
| AWH67_RS00950 | <i>dac</i>   | D-alanyl-D-alanine carboxypeptidase                                                          | 0.81  |
| AWH67_RS04025 | <i>ftsZ</i>  | cell division protein                                                                        | 0.81  |
| AWH67_RS05575 | -----        | MerR family transcriptional regulator                                                        | 0.81  |
| AWH67_RS04000 | <i>murC</i>  | UDP-N-acetylmuramate--L-alanine ligase                                                       | 0.81  |
| AWH67_RS02005 | <i>aroP</i>  | amino acid permease                                                                          | 0.80  |
| AWH67_RS01035 | <i>sucA</i>  | 2-oxoglutarate dehydrogenase E1 component                                                    | 0.80  |
| AWH67_RS02680 | -----        | PAS domain S-box protein                                                                     | 0.80  |
| AWH67_RS04690 | <i>purL</i>  | phosphoribosylformylglycinamidine synthase subunit                                           | 0.79  |
| AWH67_RS01600 | <i>acnA</i>  | aconitate hydratase                                                                          | 0.79  |
| AWH67_RS04645 | -----        | hybrid sensor histidine kinase/response regulator                                            | 0.791 |
| AWH67_RS03325 | -----        | 16S rRNA (uracil(1498)-N(3))-methyltransferase                                               | 0.79  |
| AWH67_RS03955 | <i>rsmH</i>  | ribosomal RNA small subunit methyltransferase H                                              | 0.79  |
| AWH67_RS03575 | <i>etfA</i>  | electron transfer flavoprotein subunit alpha/FixB family protein                             | 0.78  |
| AWH67_RS05895 | <i>secY</i>  | preprotein translocase subunit                                                               | 0.78  |
| AWH67_RS05420 | -----        | ATP-dependent helicase                                                                       | 0.78  |
| AWH67_RS01705 | -----        | class I SAM-dependent methyltransferase                                                      | 0.78  |
| AWH67_RS01510 | <i>aroA</i>  | 3-phosphoshikimate 1-carboxyvinyltransferase                                                 | 0.78  |
| AWH67_RS03700 | -----        | N-acetyltransferase                                                                          | 0.77  |
| AWH67_RS03085 | -----        | ABC transporter ATP-binding protein                                                          | 0.77  |
| AWH67_RS04890 | -----        | iron ABC transporter ATP-binding protein                                                     | 0.77  |
| AWH67_RS03075 | <i>nrdI</i>  | class Ib ribonucleoside-diphosphate reductase assembly flavoprotein                          | 0.76  |
| AWH67_RS05700 | <i>rimL</i>  | 50S ribosomal protein L7/L12-serine acetyltransferase                                        | 0.76  |
| AWH67_RS04315 | <i>nuoI</i>  | NADH-quinone oxidoreductase subunit I                                                        | 0.76  |
| AWH67_RS04490 | <i>tmk</i>   | dTMP kinase                                                                                  | 0.75  |
| AWH67_RS02160 | <i>trmFO</i> | FADH(2)-oxidising methylenetetrahydrofolate--tRNA-(uracil(54)-C(5))- methyltransferase       | 0.746 |
| AWH67_RS05705 | <i>recG</i>  | DNA helicase                                                                                 | 0.74  |
| AWH67_RS05740 | <i>argS</i>  | arginine--tRNA ligase                                                                        | 0.74  |
| AWH67_RS01350 | -----        | radical SAM protein                                                                          | 0.74  |
| AWH67_RS02410 | <i>uppP</i>  | undecaprenyl-diphosphatase                                                                   | 0.74  |
| AWH67_RS04300 | <i>nouF</i>  | NADH-quinone oxidoreductase subunit F                                                        | 0.73  |
| AWH67_RS03045 | <i>secA</i>  | preprotein translocase subunit                                                               | 0.73  |
| AWH67_RS04575 | <i>pyrB</i>  | aspartate carbamoyltransferase                                                               | 0.73  |
| AWH67_RS04705 | -----        | MFS transporter                                                                              | 0.73  |
| AWH67_RS01215 | <i>rlmN</i>  | 23S rRNA (adenine(2503)-C(2))-methyltransferase                                              | 0.72  |
| AWH67_RS01935 | <i>tadA</i>  | nucleoside deaminase                                                                         | 0.72  |
| AWH67_RS03730 | <i>trmL</i>  | tRNA (cytidine(34)-2'-O)-methyltransferase                                                   | 0.72  |
| AWH67_RS04365 | <i>lolD</i>  | ABC transporter ATP-binding protein                                                          | 0.71  |
| AWH67_RS00495 | <i>gap</i>   | type I glyceraldehyde-3-phosphate dehydrogenase                                              | 0.71  |
| AWH67_RS01405 | <i>lepA</i>  | elongation factor 4                                                                          | 0.71  |
| AWH67_RS00720 | <i>sdhC</i>  | succinate dehydrogenase, cytochrome b556 subunit                                             | 0.7   |
| AWH67_RS01335 | -----        | alpha/beta hydrolase                                                                         | 0.7   |
| AWH67_RS02905 | <i>tsaC</i>  | threonylcarbamoyl-AMP synthase                                                               | 0.7   |
| AWH67_RS03335 | <i>folD</i>  | bifunctional methylenetetrahydrofolate dehydrogenase/methenyltetrahydrofolate cyclohydrolase | 0.7   |
| AWH67_RS01755 | <i>metK</i>  | methionine adenosyltransferase                                                               | 0.7   |

DS: druggability score.

TABLE II

List of prioritised protein targets of *Bartonella bacilliformis* USM-LMMB07 proteins filtering by druggability scores, impact to gut microbiome and human host

| Locus tag     | Gene         | Gene product                                                                           | DS   | Human off target | Gut microb (%) |
|---------------|--------------|----------------------------------------------------------------------------------------|------|------------------|----------------|
| AWH67_RS02160 | <i>trmFO</i> | FADH(2)-oxidising methylenetetrahydrofolate--tRNA-(uracil(54)-C(5))- methyltransferase | 0.75 | 1                | 31.86          |
| AWH67_RS01090 | <i>parB</i>  | chromosome partitioning protein                                                        | 0.82 | 1                | 33.19          |
| AWH67_RS05895 | <i>secY</i>  | preprotein translocase subunit                                                         | 0.78 | 1                | 32.30          |
| AWH67_RS03000 | -----        | aspartate kinase                                                                       | 0.74 | 1.               | 30.97          |
| AWH67_RS05565 | <i>fabH</i>  | 3-oxoacyl-ACP synthase III                                                             | 0.89 | 1                | 29.65          |
| AWH67_RS01180 | <i>ihfB</i>  | integration host factor subunit beta                                                   | 0.76 | 1                | 30.09          |
| AWH67_RS05890 | <i>adk</i>   | adenylate kinase                                                                       | 0.78 | 0.64             | 27.88          |
| AWH67_RS01565 | <i>argD</i>  | acetylornithine transaminase                                                           | 0.85 | 0.65             | 25.66          |
| AWH67_RS01195 | -----        | LPS export ABC transporter ATP-binding protein                                         | 0.98 | 0.70             | 24.78          |
| AWH67_RS04595 | <i>topA</i>  | type I DNA topoisomerase                                                               | 0.71 | 0.75             | 25.66          |
| AWH67_RS03730 | <i>trmL</i>  | tRNA (cytidine(34)-2'-O)-methyltransferase                                             | 0.72 | 1                | 23.45          |
| AWH67_RS01845 | <i>moeB</i>  | molybdopterin-synthase adenyltransferase                                               | 0.75 | 0.60             | 24.34          |
| AWH67_RS02690 | -----        | DNA-binding response regulator                                                         | 0.78 | 1                | 23.89          |
| AWH67_RS02005 | <i>aroP</i>  | amino acid permease                                                                    | 0.80 | 0.75             | 22.57          |
| AWH67_RS04665 | <i>purB</i>  | adenylosuccinate lyase                                                                 | 0.86 | 0.73             | 22.57          |
| AWH67_RS02025 | <i>PheP</i>  | amino acid permease                                                                    | 0.90 | 0.76             | 22.12          |
| AWH67_RS04575 | <i>pyrB</i>  | aspartate carbamoyltransferase                                                         | 0.73 | 0.65             | 20.80          |
| AWH67_RS01020 | <i>lysI</i>  | saccharopine dehydrogenase                                                             | 0.73 | 1                | 21.24          |
| AWH67_RS03940 | <i>chvD</i>  | energy-dependent translational throttle protein                                        | 0.93 | 0.72             | 21.24          |
| AWH67_RS04890 | -----        | iron ABC transporter ATP-binding protein                                               | 0.77 | 0.70             | 20.80          |
| AWH67_RS05820 | <i>glnA</i>  | type I glutamate--ammonia ligase                                                       | 0.91 | 0.76             | 19.47          |
| AWH67_RS05315 | <i>cdsA</i>  | phosphatidate cytidyltransferase                                                       | 0.90 | 0.62             | 18.14          |
| AWH67_RS04685 | <i>PurQ</i>  | phosphoribosylformylglycinamide synthase subunit                                       | 0.89 | 0.75             | 17.70          |
| AWH67_RS04690 | <i>purL</i>  | phosphoribosylformylglycinamide synthase subunit                                       | 0.79 | 0.77             | 17.26          |
| AWH67_RS05805 | <i>ssb</i>   | single-stranded DNA-binding protein                                                    | 0.87 | 0.65             | 18.14          |
| AWH67_RS04150 | <i>cycA</i>  | D-serine/D-alanine/glycine transporter                                                 | 0.93 | 0.78             | 16.37          |
| AWH67_RS00340 | <i>exbB</i>  | biopolymer transporter                                                                 | 0.95 | 1                | 16.81          |
| AWH67_RS03955 | <i>rsmH</i>  | ribosomal RNA small subunit methyltransferase H                                        | 0.79 | 0.61             | 15.04          |
| AWH67_RS04550 | -----        | cold-shock protein                                                                     | 0.73 | 1                | 15.93          |
| AWH67_RS02790 | <i>ccrMM</i> | site-specific DNA-methyltransferase                                                    | 0.85 | 1                | 15.04          |
| AWH67_RS00880 | <i>lysA</i>  | diaminopimelate decarboxylase                                                          | 0.96 | 0.70             | 15.04          |
| AWH67_RS05705 | <i>recG</i>  | DNA helicase                                                                           | 0.74 | 0.74             | 14.16          |
| AWH67_RS05055 | <i>flil</i>  | flagellar protein export ATPase                                                        | 0.77 | 0.69             | 14.60          |
| AWH67_RS02820 | <i>ispH</i>  | 4-hydroxy-3-methylbut-2-enyl diphosphate reductase                                     | 0.88 | 1                | 13.27          |
| AWH67_RS04000 | <i>murC</i>  | UDP-N-acetylmuramate--L-alanine ligase                                                 | 0.81 | 1                | 12.83          |
| AWH67_RS01215 | <i>rlmN</i>  | 23S rRNA (adenine(2503)-C(2))-methyltransferase                                        | 0.72 | 1                | 13.27          |
| AWH67_RS05270 | <i>clpS</i>  | ATP-dependent Clp protease adapter                                                     | 0.81 | 1                | 12.83          |
| AWH67_RS04450 | -----        | SUF system Fe-S cluster assembly protein                                               | 0.80 | 1                | 12.39          |
| AWH67_RS02595 | -----        | iron ABC transporter permease                                                          | 0.99 | 1                | 11.95          |
| AWH67_RS04880 | -----        | iron ABC transporter permease                                                          | 0.84 | 1                | 11.95          |
| AWH67_RS03900 | <i>dnaG</i>  | DNA primase                                                                            | 0.77 | 1                | 11.95          |
| AWH67_RS03075 | <i>nrdI</i>  | class Ib ribonucleoside-diphosphate reductase assembly flavoprotein                    | 0.76 | 1                | 11.06          |
| AWH67_RS01510 | <i>aroA</i>  | 3-phosphoshikimate 1-carboxyvinyltransferase                                           | 0.78 | 1                | 10.18          |
| AWH67_RS01885 | -----        | aminopeptidase                                                                         | 0.96 | 1                | 11.50          |
| AWH67_RS03025 | -----        | L-cystine transporter                                                                  | 0.95 | 0.72             | 11.50          |
| AWH67_RS01985 | <i>mutL</i>  | DNA mismatch repair protein                                                            | 0.84 | 0.66             | 11.50          |
| AWH67_RS04105 | <i>folA</i>  | dihydrofolate reductase                                                                | 0.97 | 0.68             | 9.29           |
| AWH67_RS04490 | <i>tmk</i>   | dTMP kinase                                                                            | 0.75 | 1                | 9.29           |
| AWH67_RS01475 | <i>afeB</i>  | manganese transporter                                                                  | 0.86 | 0.71             | 10.18          |
| AWH67_RS05335 | <i>fabZ</i>  | beta-hydroxyacyl-ACP dehydratase                                                       | 0.92 | 1                | 9.73           |
| AWH67_RS00805 | <i>htpX</i>  | zinc metalloprotease                                                                   | 0.86 | 1                | 10.18          |
| AWH67_RS03935 | -----        | bifunctional nicotinamidase/pyrazinamidase                                             | 0.86 | 1                | 9.73           |
| AWH67_RS03645 | -----        | DegT/DnrJ/EryC1/StrS aminotransferase family protein                                   | 0.80 | 1                | 10.18          |
| AWH67_RS00395 | <i>rpmE</i>  | 50S ribosomal protein L31                                                              | 0.80 | 1                | 10.18          |
| AWH67_RS04140 | <i>pdxJ</i>  | pyridoxine 5'-phosphate synthase                                                       | 0.72 | 1                | 9.73           |
| AWH67_RS01155 | -----        | BAX inhibitor (BI)-1/YccA family protein                                               | 0.74 | 0.71             | 9.73           |
| AWH67_RS02675 | <i>pepN</i>  | aminopeptidase N                                                                       | 0.96 | 0.75             | 9.29           |
| AWH67_RS03175 | -----        | M3 family peptidase                                                                    | 0.98 | 0.70             | 9.29           |

| Locus tag     | Gene         | Gene product                                                                       | DS   | Human off target (%) | Gut microb (%) |
|---------------|--------------|------------------------------------------------------------------------------------|------|----------------------|----------------|
| AWH67_RS01895 | -----        | dipeptidase                                                                        | 0.79 | 0.73                 | 9.29           |
| AWH67_RS00405 | -----        | inositol monophosphatase                                                           | 0.73 | 0.66                 | 8.85           |
| AWH67_RS04095 | -----        | MFS transporter                                                                    | 0.90 | 1                    | 8.85           |
| AWH67_RS01650 | <i>fabI</i>  | enoyl-[acyl-carrier-protein] reductase                                             | 0.99 | 0.71                 | 7.08           |
| AWH67_RS05410 | <i>nadE</i>  | NAD <sup>+</sup> synthase                                                          | 0.73 | 1                    | 8.41           |
| AWH67_RS03545 | <i>pyrF</i>  | orotidine-5'-phosphate decarboxylase                                               | 0.88 | 1                    | 7.52           |
| AWH67_RS02870 | <i>fabI</i>  | enoyl-[acyl-carrier-protein] reductase                                             | 0.77 | 0.73                 | 7.52           |
| AWH67_RS00435 | <i>ruvC</i>  | crossover junction endodeoxyribonuclease                                           | 0.70 | 1                    | 7.52           |
| AWH67_RS02305 | <i>rmlJ</i>  | 23S rRNA (adenine(2030)-N(6))-methyltransferase                                    | 0.94 | 1                    | 5.75           |
| AWH67_RS06240 | <i>fliY</i>  | flagellar motor switch protein                                                     | 0.75 | 1                    | 7.08           |
| AWH67_RS05735 | -----        | deoxyguanosinetriphosphate triphosphohydrolase                                     | 0.87 | 1                    | 6.19           |
| AWH67_RS02550 | <i>rpoZ</i>  | DNA-directed RNA polymerase subunit omega                                          | 0.82 | 1                    | 6.64           |
| AWH67_RS03105 | <i>ugpA</i>  | sn-glycerol-3-phosphate ABC transporter permease                                   | 0.96 | 1                    | 6.19           |
| AWH67_RS06105 | <i>secD</i>  | protein translocase subunit                                                        | 0.77 | 1                    | 6.19           |
| AWH67_RS00185 | <i>maf2</i>  | septum formation protein                                                           | 0.85 | 0.64                 | 5.31           |
| AWH67_RS02935 | -----        | polyprenyl synthetase family protein                                               | 0.83 | 0.72                 | 5.75           |
| AWH67_RS04735 | <i>dnaE</i>  | DNA polymerase III subunit alpha                                                   | 0.88 | 1                    | 5.31           |
| AWH67_RS04630 | <i>grp</i>   | Lrp/AsnC family transcriptional regulator                                          | 0.84 | 1                    | 5.31           |
| AWH67_RS05540 | <i>ribH</i>  | 6,7-dimethyl-8-ribityllumazine synthase                                            | 0.71 | 1                    | 4.87           |
| AWH67_RS01345 | <i>dapE</i>  | succinyl-diaminopimelate desuccinylase                                             | 0.75 | 0.78                 | 4.87           |
| AWH67_RS02695 | <i>htrA</i>  | PDZ domain-containing protein                                                      | 0.73 | 0.66                 | 5.31           |
| AWH67_RS02660 | <i>thiE</i>  | thiamine phosphate synthase                                                        | 0.97 | 1                    | 3.54           |
| AWH67_RS00895 | -----        | TlpA family protein disulfide reductase                                            | 0.82 | 1                    | 4.42           |
| AWH67_RS05575 | -----        | MerR family transcriptional regulator                                              | 0.81 | 1                    | 3.98           |
| AWH67_RS02030 | <i>gpsA</i>  | glycerol-3-phosphate dehydrogenase (NAD(P)(+))                                     | 0.94 | 0.75                 | 4.87           |
| AWH67_RS02905 | <i>tsaC</i>  | threonylcarbamoyl-AMP synthase                                                     | 0.70 | 0.69                 | 3.54           |
| AWH67_RS01945 | -----        | 16S rRNA (guanine(966)-N(2))-methyltransferase                                     | 0.98 | 1                    | 3.98           |
| AWH67_RS03525 | <i>gidC</i>  | membrane protein insertase                                                         | 0.92 | 1                    | 3.98           |
| AWH67_RS00440 | <i>ruvA</i>  | Holliday junction branch migration protein                                         | 0.77 | 1                    | 4.42           |
| AWH67_RS05515 | <i>argC</i>  | N-acetyl-gamma-glutamyl-phosphate reductase                                        | 0.72 | 1                    | 3.98           |
| AWH67_RS04335 | <i>nuoM</i>  | NADH-quinone oxidoreductase subunit M                                              | 0.98 | 0.61                 | 3.10           |
| AWH67_RS01720 | <i>truB</i>  | tRNA pseudouridine(55) synthase                                                    | 0.79 | 0.67                 | 3.98           |
| AWH67_RS01255 | <i>tsaE</i>  | tRNA (adenosine(37)-N6)-threonylcarbamoyltransferase complex ATPase subunit type 1 | 0.88 | 1                    | 3.54           |
| AWH67_RS00580 | <i>ispG</i>  | 4-hydroxy-3-methylbut-2-en-1-yl diphosphate synthase (flavodoxin)                  | 0.83 | 1                    | 3.10           |
| AWH67_RS02995 | <i>nhaA</i>  | Na <sup>+</sup> /H <sup>+</sup> antiporter                                         | 0.80 | 1                    | 3.98           |
| AWH67_RS01890 | <i>mutM</i>  | formamidopyrimidine-DNA glycosylase                                                | 0.93 | 1                    | 3.54           |
| AWH67_RS00210 | <i>purK</i>  | 5-(carboxyamino)imidazole ribonucleotide synthase                                  | 0.87 | 1                    | 3.10           |
| AWH67_RS02680 | -----        | PAS domain S-box protein                                                           | 0.80 | 1                    | 2.65           |
| AWH67_RS05445 | -----        | heat-shock protein                                                                 | 0.71 | 1                    | 3.54           |
| AWH67_RS05740 | <i>argS</i>  | arginine--tRNA ligase                                                              | 0.74 | 0.67                 | 2.21           |
| AWH67_RS05775 | -----        | MFS transporter                                                                    | 0.86 | 1                    | 2.21           |
| AWH67_RS02020 | <i>bioY</i>  | biotin transporter                                                                 | 0.91 | 1                    | 1.77           |
| AWH67_RS02410 | <i>uppP</i>  | undecaprenyl-diphosphatase                                                         | 0.74 | 1                    | 1.33           |
| AWH67_RS00825 | -----        | carbonic anhydrase                                                                 | 0.84 | 1                    | 2.21           |
| AWH67_RS06050 | <i>gltJ1</i> | amino acid ABC transporter permease                                                | 0.74 | 1                    | 2.65           |
| AWH67_RS04320 | <i>nuoJ</i>  | NADH-quinone oxidoreductase subunit J                                              | 0.71 | 1                    | 2.21           |
| AWH67_RS01010 | <i>phaAB</i> | monovalent cation/H <sup>+</sup> antiporter subunit A                              | 0.97 | 0.66                 | 2.21           |
| AWH67_RS04050 | -----        | aminopeptidase P family protein                                                    | 0.99 | 0.62                 | 2.65           |
| AWH67_RS02570 | -----        | transglycosylase                                                                   | 0.90 | 1                    | 2.21           |
| AWH67_RS02665 | <i>thiD</i>  | hydroxymethylpyrimidine/phosphomethylpyrimidine kinase                             | 0.84 | 1                    | 0.88           |
| AWH67_RS00135 | -----        | terminase                                                                          | 0.84 | 1                    | 2.21           |
| AWH67_RS04340 | <i>nuoN</i>  | NADH-quinone oxidoreductase subunit                                                | 1    | 0.78                 | 1.77           |
| AWH67_RS02405 | <i>fabD</i>  | [acyl-carrier-protein] S-malonyltransferase                                        | 0.91 | 0.68                 | 1.77           |
| AWH67_RS04795 | -----        | rhodanese domain-containing protein                                                | 0.75 | 0.66                 | 1.77           |
| AWH67_RS03780 | <i>lgt</i>   | prolipoprotein diacylglycerol transferase                                          | 0.97 | 1                    | 0.88           |
| AWH67_RS01015 | <i>nspC</i>  | carboxynorspermidine decarboxylase                                                 | 0.90 | 1                    | 1.33           |
| AWH67_RS03835 | -----        | TrkH family potassium uptake protein                                               | 0.90 | 1                    | 1.77           |
| AWH67_RS03180 | <i>mgtE</i>  | magnesium transporter                                                              | 0.85 | 1                    | 0.88           |
| AWH67_RS00080 | -----        | hypothetical protein                                                               | 0.76 | 1                    | 1.77           |

| Locus tag     | Gene        | Gene product                                                                     | DS   | Human off target (%) | Gut microb (%) |
|---------------|-------------|----------------------------------------------------------------------------------|------|----------------------|----------------|
| AWH67_RS05700 | <i>rimL</i> | 50S ribosomal protein L7/L12-serine acetyltransferase                            | 0.76 | 1                    | 0.88           |
| AWH67_RS01375 | -----       | DNA-binding response regulator                                                   | 0.74 | 1                    | 1.77           |
| AWH67_RS01675 | -----       | peptidoglycan endopeptidase                                                      | 0.73 | 1                    | 1.77           |
| AWH67_RS01270 | <i>folC</i> | bifunctional folylpolyglutamate synthase/dihydrofolate synthase                  | 0.85 | 0.70                 | 0.44           |
| AWH67_RS05400 | <i>gor</i>  | glutathione-disulfide reductase                                                  | 0.83 | 0.64                 | 0              |
| AWH67_RS03970 | <i>murE</i> | UDP-N-acetylmuramoyl-L-alanyl-D-glutamate--2, 6-diaminopimelate ligase           | 0.95 | 1                    | 0              |
| AWH67_RS00420 | <i>thiE</i> | thiamine phosphate synthase                                                      | 1    | 1                    | 0              |
| AWH67_RS02270 | -----       | peptidylprolyl isomerase                                                         | 0.96 | 1                    | 0              |
| AWH67_RS00680 | -----       | efflux RND transporter periplasmic adaptor subunit                               | 0.94 | 1                    | 1.33           |
| AWH67_RS01415 | -----       | TIGR00730 family Rossmann fold protein                                           | 0.93 | 1                    | 1.33           |
| AWH67_RS02795 | -----       | HAD family phosphatase                                                           | 0.90 | 1                    | 0.44           |
| AWH67_RS02915 | <i>ispE</i> | 4-(cytidine 5'-diphospho)-2-C-methyl-D-erythritol kinase                         | 0.88 | 1                    | 0              |
| AWH67_RS01750 | <i>trmB</i> | tRNA (guanosine(46)-N7)-methyltransferase                                        | 0.84 | 1                    | 0              |
| AWH67_RS02925 | -----       | S49 family peptidase                                                             | 0.84 | 1                    | 1.33           |
| AWH67_RS05130 | <i>flhA</i> | flagellar biosynthesis protein                                                   | 0.83 | 1                    | 1.33           |
| AWH67_RS00950 | <i>dac</i>  | D-alanyl-D-alanine carboxypeptidase                                              | 0.81 | 1                    | 0.44           |
| AWH67_RS03665 | -----       | DNA-binding response regulator                                                   | 0.80 | 1                    | 1.33           |
| AWH67_RS03325 | -----       | 16S rRNA (uracil(1498)-N(3))-methyltransferase                                   | 0.79 | 1                    | 0              |
| AWH67_RS01355 | <i>rdgB</i> | non-canonical purine NTP pyrophosphatase                                         | 0.93 | 0.72                 | 0.44           |
| AWH67_RS04580 | <i>pyrC</i> | dihydroorotase                                                                   | 0.83 | 0.75                 | 0.44           |
| AWH67_RS03085 | -----       | ABC transporter ATP-binding protein                                              | 0.77 | 0.69                 | 0.44           |
| AWH67_RS04205 | <i>lipB</i> | lipoate-protein ligase B                                                         | 0.73 | 0.65                 | 0.88           |
| AWH67_RS00720 | <i>sdhC</i> | succinate dehydrogenase, cytochrome b556 subunit                                 | 0.70 | 0.60                 | 0              |
| AWH67_RS04570 | -----       | acyl-CoA dehydrogenase                                                           | 1    | 1                    | 0              |
| AWH67_RS05345 | -----       | DUF1009 domain-containing protein                                                | 0.98 | 1                    | 0              |
| AWH67_RS00535 | <i>thiN</i> | thiamine diphosphokinase                                                         | 0.94 | 1                    | 0.44           |
| AWH67_RS05265 | -----       | penicillin-binding protein                                                       | 0.92 | 1                    | 0              |
| AWH67_RS03135 | <i>usp</i>  | universal stress protein                                                         | 0.86 | 1                    | 0              |
| AWH67_RS04220 | -----       | MFS transporter                                                                  | 0.86 | 1                    | 0              |
| AWH67_RS00840 | -----       | DNA-binding protein                                                              | 0.85 | 1                    | 0              |
| AWH67_RS04635 | <i>cobT</i> | nicotinate-nucleotide--dimethylbenzimidazole phosphoribosyltransferase           | 0.84 | 1                    | 0              |
| AWH67_RS01690 | -----       | asparaginase                                                                     | 0.81 | 1                    | 0.88           |
| AWH67_RS00750 | <i>xerC</i> | tyrosine recombinase                                                             | 0.79 | 1                    | 0.88           |
| AWH67_RS04645 | -----       | hybrid sensor histidine kinase/response regulator                                | 0.79 | 1                    | 0              |
| AWH67_RS01705 | -----       | class I SAM-dependent methyltransferase                                          | 0.78 | 1                    | 0              |
| AWH67_RS03700 | -----       | N-acetyltransferase                                                              | 0.77 | 1                    | 0              |
| AWH67_RS01745 | <i>rimP</i> | ribosome maturation factor                                                       | 0.75 | 1                    | 0.88           |
| AWH67_RS00525 | -----       | ABC transporter ATP-binding protein                                              | 0.98 | 0.70                 | 0              |
| AWH67_RS05465 | -----       | NADPH:quinone oxidoreductase                                                     | 0.93 | 0.72                 | 0              |
| AWH67_RS00295 | <i>dnaG</i> | DNA primase                                                                      | 0.86 | 0.76                 | 0              |
| AWH67_RS01825 | -----       | cytochrome c family protein                                                      | 1    | 0.62                 | 0              |
| AWH67_RS04560 | <i>gatC</i> | Asp-tRNA(Asn)/Glu-tRNA(Gln) amidotransferase GatCAB subunit C                    | 0.81 | 0.70                 | 0.44           |
| AWH67_RS02375 | <i>rsmA</i> | 16S rRNA (adenine(1518)-N(6)/adenine(1519)-N(6))- dimethyltransferase            | 0.83 | 0.62                 | 0.44           |
| AWH67_RS01335 | -----       | alpha/beta hydrolase                                                             | 0.70 | 0.67                 | 0              |
| AWH67_RS05475 | -----       | beta-ketoacyl-ACP synthase II                                                    | 0.97 | 1                    | 0              |
| AWH67_RS03605 | -----       | ABC transporter substrate-binding protein                                        | 0.97 | 1                    | 0              |
| AWH67_RS03610 | -----       | ABC transporter substrate-binding protein                                        | 0.95 | 1                    | 0              |
| AWH67_RS01975 | <i>lpxK</i> | tetraacyldisaccharide 4'-kinase                                                  | 0.93 | 1                    | 0              |
| AWH67_RS00715 | <i>sdhD</i> | succinate dehydrogenase, hydrophobic membrane anchor protein                     | 0.92 | 1                    | 0              |
| AWH67_RS01150 | -----       | diguanylate cyclase                                                              | 0.91 | 1                    | 0              |
| AWH67_RS01100 | <i>rsmG</i> | ribosomal RNA small subunit methyltransferase G                                  | 0.88 | 1                    | 0              |
| AWH67_RS03995 | <i>murG</i> | undecaprenyldiphospho-muramoylpentapeptide beta-N- acetylglucosaminyltransferase | 0.73 | 1                    | 0              |
| AWH67_RS04040 | <i>recN</i> | DNA repair protein                                                               | 0.85 | 1                    | 0.44           |
| AWH67_RS02805 | -----       | PAS domain S-box protein                                                         | 0.84 | 1                    | 0              |
| AWH67_RS01245 | <i>addA</i> | double-strand break repair helicase                                              | 0.82 | 1                    | 0.44           |
| AWH67_RS01230 | <i>lisS</i> | lysine--tRNA ligase                                                              | 0.80 | 1                    | 0              |
| AWH67_RS05370 | -----       | amino acid ABC transporter                                                       | 0.78 | 1                    | 0.44           |
| AWH67_RS05235 | <i>rplJ</i> | 50S ribosomal protein L10                                                        | 0.97 | 0.77                 | 0.44           |
| AWH67_RS03530 | <i>rnpA</i> | ribonuclease P protein component                                                 | 0.74 | 1                    | 0.44           |

| Locus tag     | Gene        | Gene product                                                         | DS   | Human off target | Gut microb (%) |
|---------------|-------------|----------------------------------------------------------------------|------|------------------|----------------|
| AWH67_RS04440 | <i>sufD</i> | Fe-S cluster assembly protein                                        | 0.73 | 1                | 0.44           |
| AWH67_RS01000 | <i>phaD</i> | monovalent cation/H <sup>+</sup> antiporter subunit D                | 0.97 | 0.75             | 0.44           |
| AWH67_RS04985 | -----       | autotransporter outer membrane beta-barrel domain-containing protein | 0.70 | 1                | 0.44           |
| AWH67_RS01955 | <i>cysQ</i> | 3'(2'),5'-biphosphate nucleotidase                                   | 0.93 | 0.76             | 0              |
| AWH67_RS05195 | <i>hisS</i> | histidine--tRNA ligase                                               | 0.88 | 0.70             | 0              |
| AWH67_RS04425 | -----       | cysteine desulfurase                                                 | 0.83 | 0.69             | 0              |
| AWH67_RS05835 | -----       | RluA family pseudouridine synthase                                   | 0.80 | 0.68             | 0              |
| AWH67_RS04705 | -----       | MFS transporter                                                      | 0.73 | 0.70             | 0              |
| AWH67_RS00130 | -----       | phage portal protein                                                 | 0.99 | 1                | 0              |
| AWH67_RS03305 | -----       | efflux RND transporter periplasmic adaptor subunit                   | 0.99 | 1                | 0              |
| AWH67_RS00835 | -----       | glutamine amidotransferase                                           | 0.97 | 1                | 0              |
| AWH67_RS02360 | <i>lptD</i> | LPS-assembly protein                                                 | 0.97 | 1                | 0              |
| AWH67_RS02775 | <i>dsbA</i> | DsbA family protein                                                  | 0.97 | 1                | 0              |
| AWH67_RS02325 | -----       | autotransporter outer membrane beta-barrel domain-containing protein | 0.97 | 1                | 0              |
| AWH67_RS05490 | -----       | hypothetical protein                                                 | 0.94 | 1                | 0              |
| AWH67_RS01120 | -----       | phosphoenolpyruvate synthase regulatory protein                      | 0.94 | 1                | 0              |
| AWH67_RS04870 | -----       | autotransporter outer membrane beta-barrel domain-containing protein | 0.94 | 1                | 0              |
| AWH67_RS04995 | -----       | autotransporter outer membrane beta-barrel domain-containing protein | 0.92 | 1                | 0              |
| AWH67_RS01550 | -----       | Smr domain-containing protein                                        | 0.91 | 1                | 0              |
| AWH67_RS02355 | <i>lptG</i> | LPS export ABC transporter permease                                  | 0.90 | 1                | 0              |
| AWH67_RS02015 | <i>ecfT</i> | energy-coupling factor transporter transmembrane protein             | 0.90 | 1                | 0              |
| AWH67_RS04930 | <i>flgK</i> | flagellar hook-associated protein                                    | 0.87 | 1                | 0              |
| AWH67_RS04940 | -----       | DNA-binding response regulator                                       | 0.87 | 1                | 0              |
| AWH67_RS03695 | -----       | metallophosphoesterase                                               | 0.86 | 1                | 0              |
| AWH67_RS03150 | -----       | sigma-54-dependent Fis family transcriptional regulator              | 0.86 | 1                | 0              |
| AWH67_RS02200 | <i>ntfY</i> | PAS domain-containing sensor histidine kinase                        | 0.86 | 1                | 0              |
| AWH67_RS01280 | -----       | cysteine biosynthesis protein                                        | 0.85 | 1                | 0              |
| AWH67_RS01770 | <i>corC</i> | HlyC/CorC family transporter                                         | 0.85 | 1                | 0              |
| AWH67_RS02580 | -----       | TonB-dependent hemoglobin/transferrin/lactoferrin family receptor    | 0.83 | 1                | 0              |
| AWH67_RS02435 | <i>dnaB</i> | replicative DNA helicase                                             | 0.83 | 1                | 0              |
| AWH67_RS00510 | <i>zapA</i> | cell division protein                                                | 0.81 | 1                | 0              |
| AWH67_RS00640 | -----       | hypothetical protein                                                 | 0.81 | 1                | 0              |
| AWH67_RS03710 | -----       | DUF4159 domain-containing protein                                    | 0.81 | 1                | 0              |
| AWH67_RS00910 | <i>holA</i> | DNA polymerase III subunit delta                                     | 0.80 | 1                | 0              |
| AWH67_RS04990 | -----       | autotransporter outer membrane beta-barrel domain-containing protein | 0.80 | 1                | 0              |
| AWH67_RS00980 | -----       | hypothetical protein                                                 | 0.79 | 1                | 0              |
| AWH67_RS04165 | -----       | hypothetical protein                                                 | 0.77 | 1                | 0              |
| AWH67_RS03560 | -----       | pyrroline-5-carboxylate reductase                                    | 0.77 | 1                | 0              |
| AWH67_RS02350 | <i>lptF</i> | LPS export ABC transporter permease                                  | 0.77 | 1                | 0              |
| AWH67_RS01495 | <i>ndvB</i> | protein ndvB                                                         | 0.75 | 1                | 0              |
| AWH67_RS05075 | <i>fliM</i> | flagellar motor switch protein                                       | 0.74 | 1                | 0              |
| AWH67_RS03870 | <i>tetA</i> | tetracycline resistance MFS efflux pump                              | 0.98 | 0.75             | 0              |
| AWH67_RS02510 | <i>recO</i> | DNA repair protein                                                   | 0.73 | 1                | 0              |
| AWH67_RS04080 | -----       | hypothetical protein                                                 | 0.73 | 1                | 0              |
| AWH67_RS00430 | -----       | DUF1465 domain-containing protein                                    | 0.73 | 1                | 0              |
| AWH67_RS05000 | -----       | hypothetical protein                                                 | 0.72 | 1                | 0              |

DS: druggability score, human off target: this score reflects the results of a blastp search of the pathogen protein in the human proteome database with the scale 1 - max (alignment identity), so when a protein has no hit in the human proteome, the value is 1. Gut microbiome: percentage of the 226 representative microorganisms of human intestinal flora sequenced by the Human Microbiome Project that have at least one hit with any pathogen protein.
